# Supplementary material for: Intrinsically chiral paddlewheel diruthenium complexes
Source: Royal Society of Chemistry journal article supplement (doi:10.1039/d4ce01040j), 2024-01-01

## Intrinsically Chiral Paddlewheel Diruthenium Complexes

Isabel Coloma,<sup>a</sup> Santiago Herrero,<sup>a,b</sup> and Miguel Cortijo<sup>\*a</sup>

<sup>a</sup>MatMoPol Research Group, Inorganic Chemistry Department, Faculty of Chemical Sciences, Complutense University of Madrid, E-28040 Madrid, Spain.

<sup>b</sup>Knowledge Technology Institute, Complutense University of Madrid, Campus de Somosaguas, E-28223 Pozuelo de Alarcón, Madrid, Spain.

Correspondence: miguelcortijomontes@ucm.es

### INDEX

#### S1. Mass spectrometry

- Figure S1. Mass spectrum of *cis*-[Ru<sub>2</sub>Cl(μ-DPhF)<sub>2</sub>(μ-OAc)<sub>2</sub>] and enlargement of the base peak and the calculated isotopic pattern (DPhF = *N,N'*-diphenylformamidinate).
- Figure S2. Mass spectrum of *cis*-[Ru<sub>2</sub>Cl(μ-DAniF)<sub>2</sub>(μ-OAc)<sub>2</sub>] and enlargement of the base peak and the calculated isotopic pattern (DAniF = *N,N'*-bis(*p*-methoxyphenyl)formamidinate).
- Figure S3. Mass spectrum of *cis*-[Ru<sub>2</sub>Cl(μ-DPhF)<sub>2</sub>(μ-hmp)(μ-OAc)] (**Ruhmp**) and enlargement of the base peak and the calculated isotopic pattern.
- Figure S4. Mass spectrum of *cis*-[Ru<sub>2</sub>Cl(μ-DPhF)<sub>2</sub>(μ-amp)(μ-OAc)] (**Ruamp**) and enlargement of the base peak and the calculated isotopic pattern.
- Figure S5. Mass spectrum of *cis*-[Ru<sub>2</sub>Cl(μ-DAniF)<sub>2</sub>(μ-hmp)(μ-OAc)] (**Ru'hmp**) and enlargement of the base peak and the calculated isotopic pattern.
- Figure S6. Mass spectrum of *cis*-[Ru<sub>2</sub>Cl(μ-DAniF)<sub>2</sub>(μ-amp)(μ-OAc)] (**Ru'amp**) and enlargement of the base peak and the calculated isotopic pattern.

#### S2. Infrared spectroscopy

- Figure S7. Infrared spectra of **Ruhmp**, **Ruamp**, **Ru'hmp** and **Ru'amp**.
- Figure S8. Comparison between the IR spectra of *cis*-[Ru<sub>2</sub>Cl(μ-DAniF)<sub>2</sub>(μ-OAc)<sub>2</sub>], **Ru'hmp** and **Ru'amp**.
- Figure S9. Comparison between the IR spectra of **Ruhmp** and **Ruamp**.
- Figure S10. Comparison between the IR spectra of **Ruhmp** and **Ru'hmp**.

#### S3. Single crystal X-ray diffraction

- Table S1. Crystal and structure refinement data for **Ruhmp**.
- Table S2. Crystal and structure refinement data for **Ruamp**·Et<sub>2</sub>O.
- Table S3. Crystal and structure refinement data for **Ru'hmp**.
- Table S4. Crystal and structure refinement data for **Ru'amp**·0.5C<sub>6</sub>H<sub>12</sub>.

#### S4. Magnetic measurements

- Figure S11. Temperature dependence of the molar susceptibility  $\chi_M$  and  $\chi_M T$  for **Ruhmp**.
- Figure S12. Temperature dependence of the molar susceptibility  $\chi_M$  and  $\chi_M T$  for **Ruamp**.
- Figure S14. Temperature dependence of the molar susceptibility  $\chi_M$  and  $\chi_M T$  for **Ru'amp**.
- Equations S1-S4 employed in the fitting of the magnetic data

S5. Procedure employed to assign polyhedral symbol, coordination index, configuration number and chirality symbol to coordination compounds with paddlewheel structure

## S1. Mass spectrometry

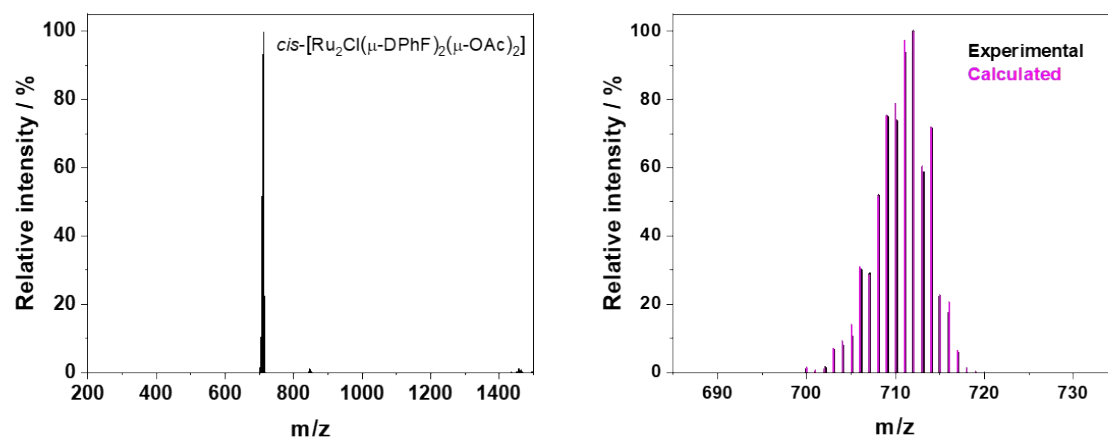

**Figure S1.** Mass spectrum (ESI<sup>+</sup>) of  $cis\text{-}[\text{Ru}_2\text{Cl}(\mu\text{-DPhF})_2(\mu\text{-OAc})_2]$  (left) and enlargement of the  $[\text{M}-\text{Cl}]^+$  base peak (black) and the calculated isotopic pattern (pink) (right).

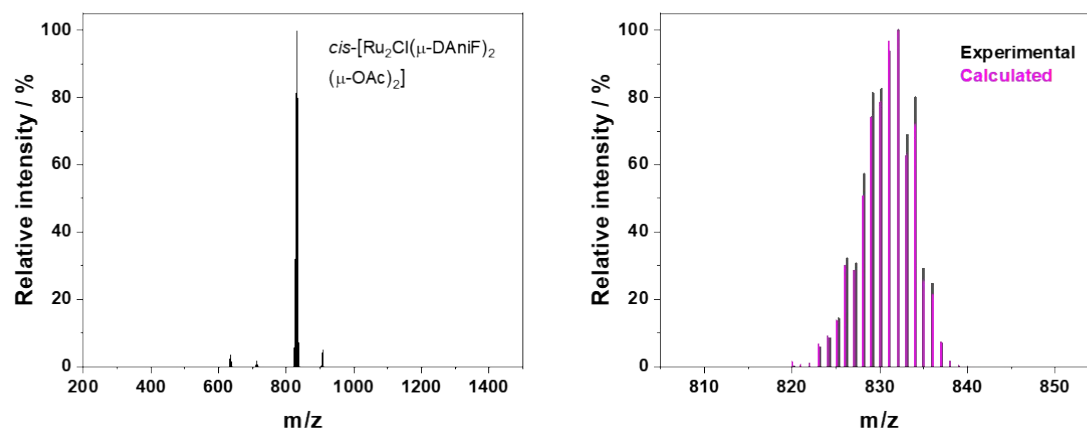

**Figure S2.** Mass spectrum (ESI<sup>+</sup>) of  $cis\text{-}[\text{Ru}_2\text{Cl}(\mu\text{-DAniF})_2(\mu\text{-OAc})_2]$  (left) and enlargement of the  $[\text{M}-\text{Cl}]^+$  base peak (black) and the calculated isotopic pattern (pink) (right).

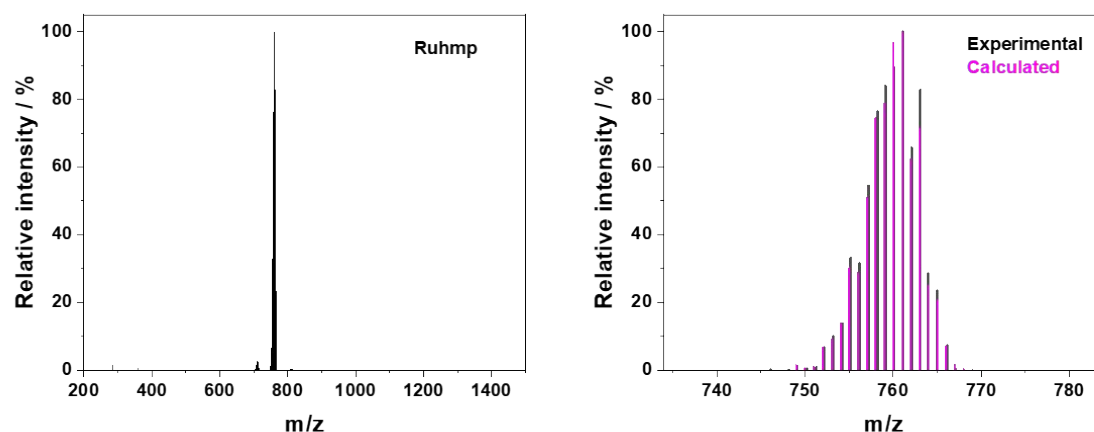

**Figure S3.** Mass spectrum (ESI<sup>+</sup>) of **Ruhmp** (left) and enlargement of the  $[\text{M}-\text{Cl}]^+$  base peak (black) and the calculated isotopic pattern (pink) (right).

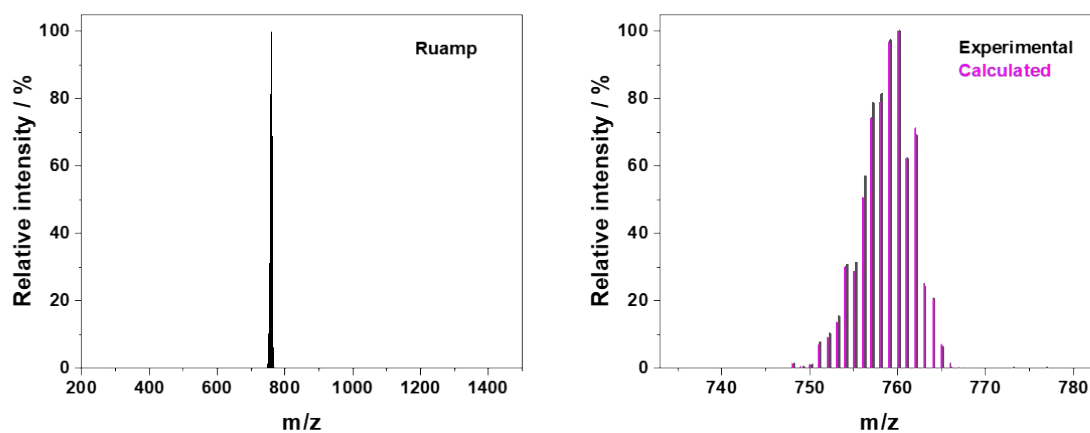

**Figure S4.** Mass spectrum (ESI<sup>+</sup>) of **Ruamp** (left) and enlargement of the [M-Cl]<sup>+</sup> base peak (black) and the calculated isotopic pattern (pink) (right).

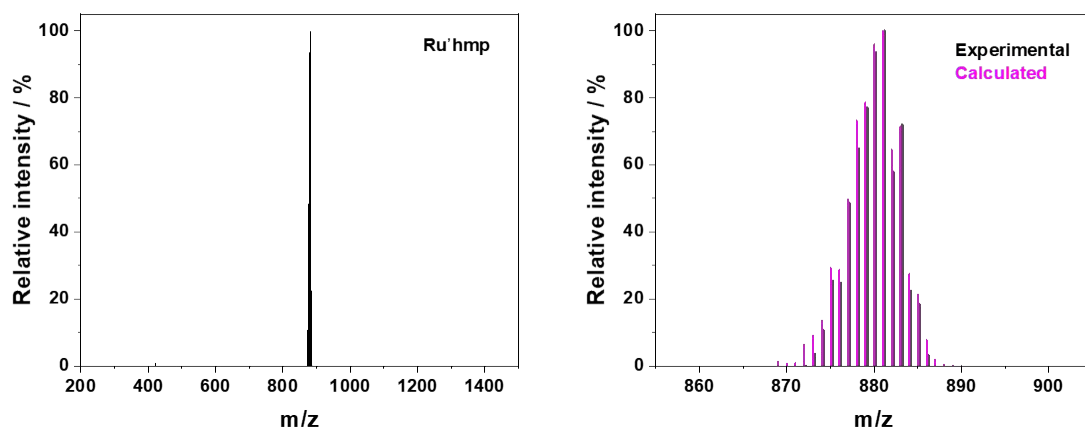

**Figure S5.** Mass spectrum (ESI<sup>+</sup>) of **Ru'hmp** (left) and enlargement of the [M-Cl]<sup>+</sup> base peak (black) and the calculated isotopic pattern (pink) (right).

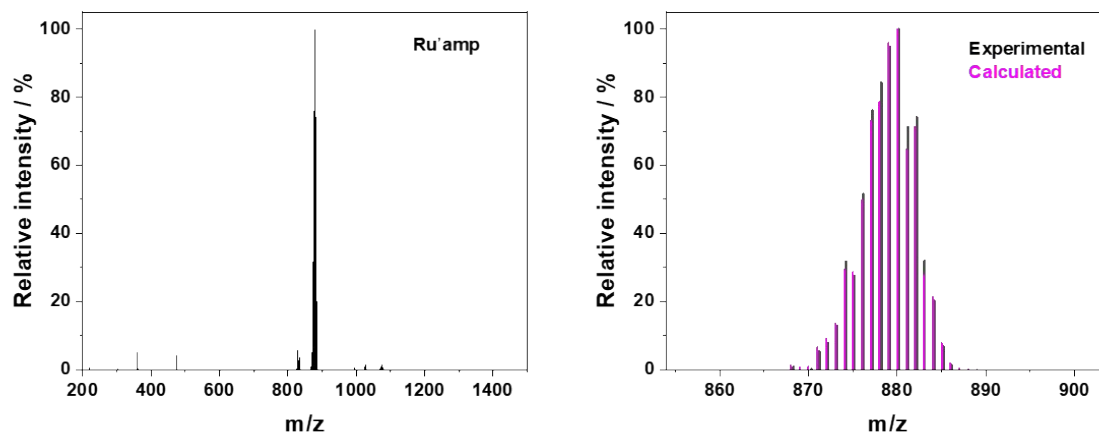

**Figure S6.** Mass spectrum (ESI<sup>+</sup>) of **Ru'amp** (left) and enlargement of the [M-Cl]<sup>+</sup> base peak (black) and the calculated isotopic pattern (pink) (right).

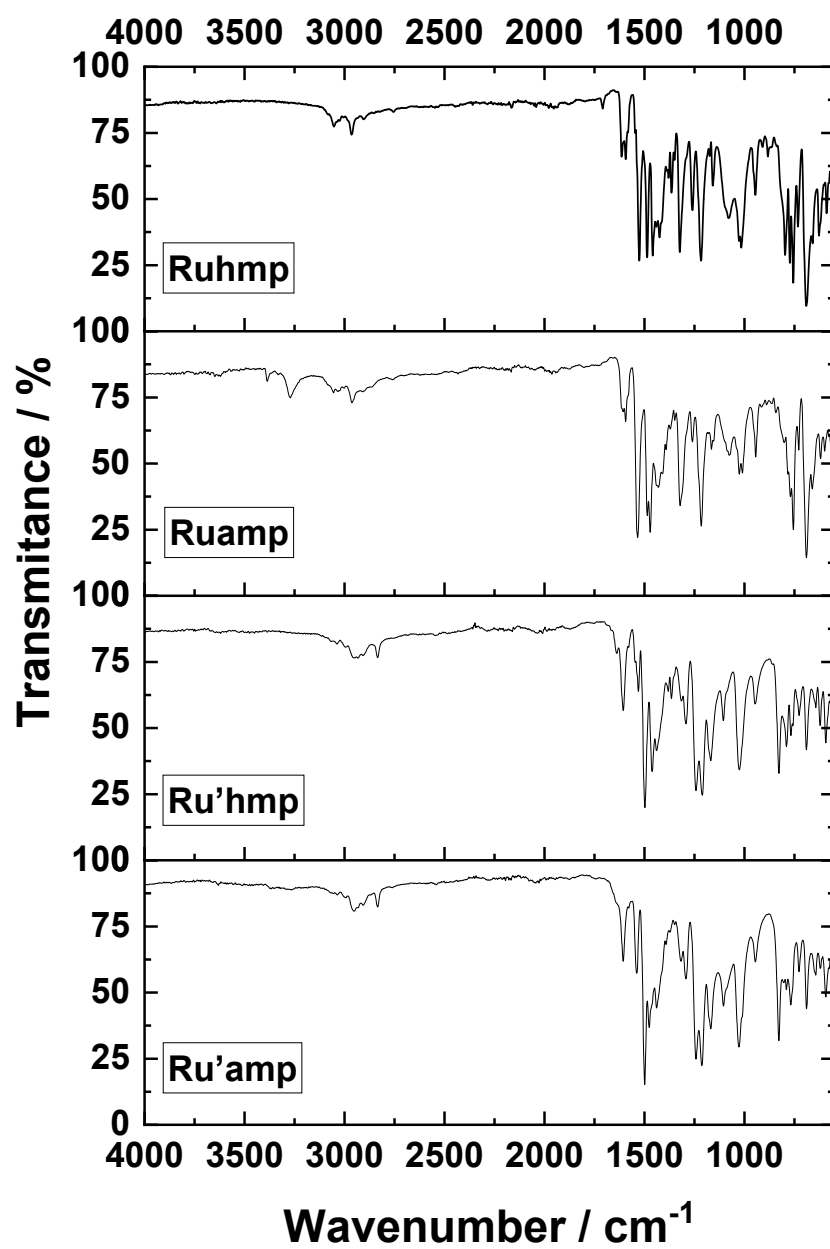

Figure S7. Infrared spectra of Ruhmp, Ruamp, Ru'hmp and Ru'amp.

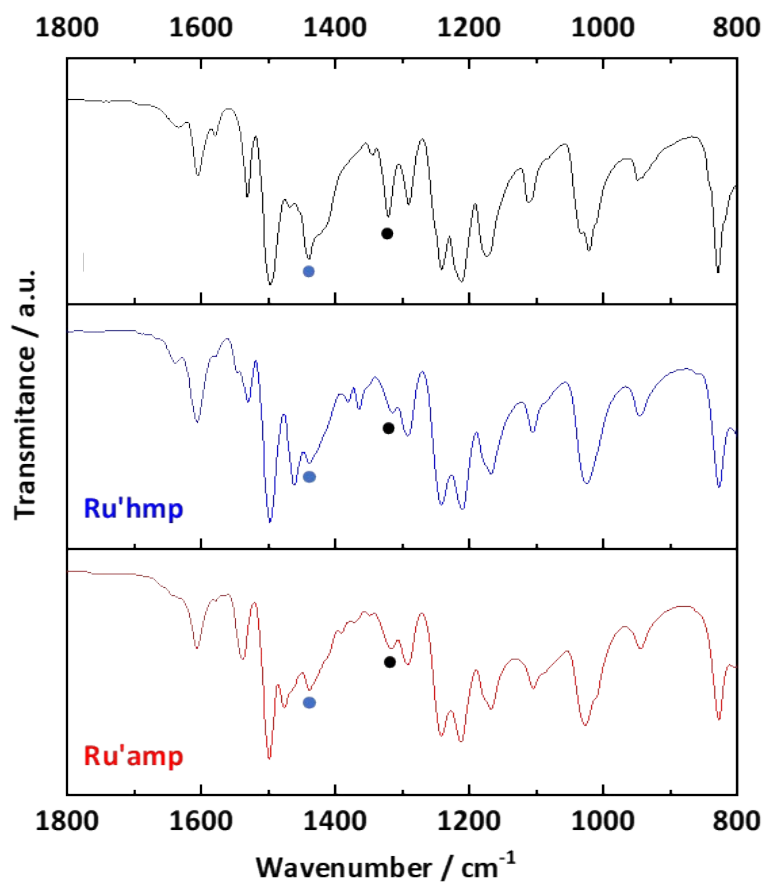

**Figure S8.** Comparison between the IR spectra of *cis*-[Ru<sub>2</sub>Cl(μ-DAniF)<sub>2</sub>(μ-OAc)<sub>2</sub>] (black), **Ru'hmp** (blue) and **Ru'amp** (red). The O-C-O antisymmetric stretching bands are marked with blue circles and the symmetric ones with a black circle.

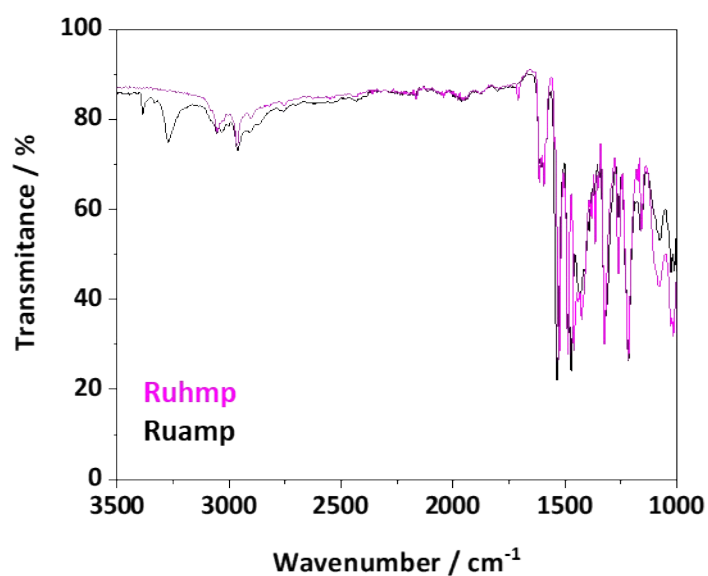

**Figure S9.** Comparison between the IR spectra of **Ruhmp** (pink) and **Ruamp** (black).

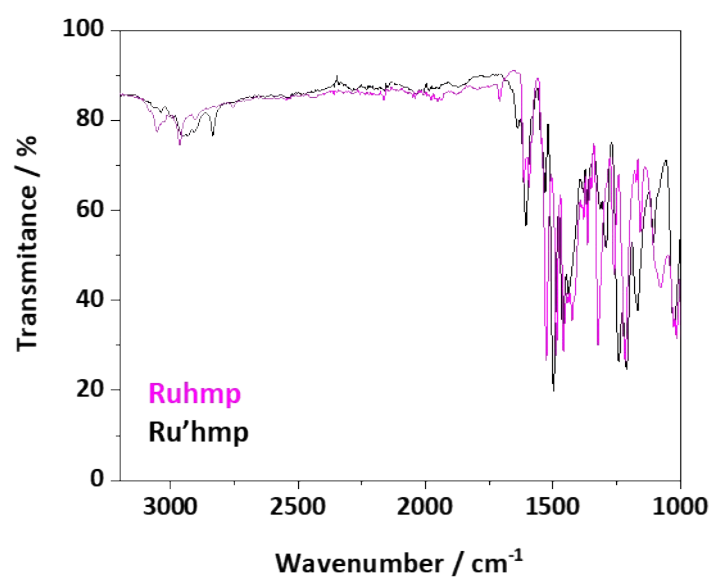

**Figure S10.** Comparison between the IR spectra of **Ruhmp** (pink) and **Ru'hmp** (black).

### S3. Single crystal X-ray diffraction

**Table S1.** Crystal and structure refinement data for **Ruhmp**.

|                                                              |                                                                                 |
|--------------------------------------------------------------|---------------------------------------------------------------------------------|
| Empirical formula                                            | C <sub>34</sub> H <sub>31</sub> ClN <sub>5</sub> O <sub>3</sub> Ru <sub>2</sub> |
| Formula weight                                               | 795.23                                                                          |
| Temperature/K                                                | 100.0                                                                           |
| Crystal system                                               | monoclinic                                                                      |
| Space group                                                  | <i>P</i> 2 <sub>1</sub> / <i>n</i>                                              |
| <i>a</i> /Å                                                  | 9.8282(5)                                                                       |
| <i>b</i> /Å                                                  | 19.5453(9)                                                                      |
| <i>c</i> /Å                                                  | 16.2510(8)                                                                      |
| $\alpha$ /°                                                  | 90                                                                              |
| $\beta$ /°                                                   | 98.094(2)                                                                       |
| $\gamma$ /°                                                  | 90                                                                              |
| Volume/Å <sup>3</sup>                                        | 3090.6(3)                                                                       |
| <i>Z</i>                                                     | 4                                                                               |
| $\rho_{\text{calc}}/\text{g}\cdot\text{cm}^{-3}$             | 1.709                                                                           |
| $\mu/\text{mm}^{-1}$                                         | 9.072                                                                           |
| <i>F</i> (000)                                               | 1596.0                                                                          |
| Crystal size/mm <sup>3</sup>                                 | 0.208 × 0.049 × 0.03                                                            |
| Radiation                                                    | CuK $\alpha$ ( $\lambda$ = 1.54178)                                             |
| 2 $\theta$ range for data collection/°                       | 7.116 to 136.482                                                                |
| Index ranges                                                 | -11 ≤ <i>h</i> ≤ 11, -23 ≤ <i>k</i> ≤ 23, -19 ≤ <i>l</i> ≤ 19                   |
| Reflections collected                                        | 91840                                                                           |
| Independent reflections                                      | 5652 [ <i>R</i> <sub>int</sub> = 0.0718, <i>R</i> <sub>sigma</sub> = 0.0261]    |
| Data/restraints/parameters                                   | 5652/0/408                                                                      |
| Goodness-of-fit on <i>F</i> <sup>2</sup>                     | 1.073                                                                           |
| Final <i>R</i> indexes [ <i>I</i> ≥ 2 $\sigma$ ( <i>I</i> )] | <i>R</i> <sub>1</sub> = 0.0357, <i>wR</i> <sub>2</sub> = 0.1003                 |
| Final <i>R</i> indexes [all data]                            | <i>R</i> <sub>1</sub> = 0.0373, <i>wR</i> <sub>2</sub> = 0.1018                 |
| Largest diff. peak/hole / e <sup>-</sup> Å <sup>-3</sup>     | 1.56/-0.89                                                                      |

**Table S2.** Crystal and structure refinement data for **Ruamp**·Et<sub>2</sub>O.

|                                                              |                                                                                 |
|--------------------------------------------------------------|---------------------------------------------------------------------------------|
| Empirical formula                                            | C <sub>38</sub> H <sub>42</sub> ClN <sub>6</sub> O <sub>3</sub> Ru <sub>2</sub> |
| Formula weight                                               | 868.36                                                                          |
| Temperature/K                                                | 100.0                                                                           |
| Crystal system                                               | monoclinic                                                                      |
| Space group                                                  | <i>P</i> 2 <sub>1</sub> / <i>n</i>                                              |
| <i>a</i> /Å                                                  | 12.6609(6)                                                                      |
| <i>b</i> /Å                                                  | 12.1468(6)                                                                      |
| <i>c</i> /Å                                                  | 24.3520(12)                                                                     |
| $\alpha$ /°                                                  | 90                                                                              |
| $\beta$ /°                                                   | 100.814(2)                                                                      |
| $\gamma$ /°                                                  | 90                                                                              |
| Volume/Å <sup>3</sup>                                        | 3678.6(3)                                                                       |
| <i>Z</i>                                                     | 4                                                                               |
| $\rho_{\text{calc}}/\text{g}\cdot\text{cm}^{-3}$             | 1.568                                                                           |
| $\mu/\text{mm}^{-1}$                                         | 7.681                                                                           |
| <i>F</i> (000)                                               | 1764.0                                                                          |
| Crystal size/mm <sup>3</sup>                                 | 0.284 × 0.045 × 0.016                                                           |
| Radiation                                                    | CuK $\alpha$ ( $\lambda$ = 1.54178)                                             |
| 2 $\theta$ range for data collection/°                       | 7.37 to 136.49                                                                  |
| Index ranges                                                 | -15 ≤ <i>h</i> ≤ 15, -14 ≤ <i>k</i> ≤ 14, -29 ≤ <i>l</i> ≤ 29                   |
| Reflections collected                                        | 115688                                                                          |
| Independent reflections                                      | 6738 [ <i>R</i> <sub>int</sub> = 0.0634, <i>R</i> <sub>sigma</sub> = 0.0222]    |
| Data/restraints/parameters                                   | 6738/0/459                                                                      |
| Goodness-of-fit on <i>F</i> <sup>2</sup>                     | 1.070                                                                           |
| Final <i>R</i> indexes [ <i>I</i> ≥ 2 $\sigma$ ( <i>I</i> )] | <i>R</i> <sub>1</sub> = 0.0264, <i>wR</i> <sub>2</sub> = 0.0749                 |
| Final <i>R</i> indexes [all data]                            | <i>R</i> <sub>1</sub> = 0.0272, <i>wR</i> <sub>2</sub> = 0.0756                 |
| Largest diff. peak/hole / e·Å <sup>-3</sup>                  | 0.67/-0.90                                                                      |



**Table S3.** Crystal and structure refinement data for **Ru'hmp**.

|                                                              |                                                                                 |
|--------------------------------------------------------------|---------------------------------------------------------------------------------|
| Empirical formula                                            | C <sub>38</sub> H <sub>39</sub> ClN <sub>5</sub> O <sub>7</sub> Ru <sub>2</sub> |
| Formula weight                                               | 915.33                                                                          |
| Temperature/K                                                | 100.0                                                                           |
| Crystal system                                               | monoclinic                                                                      |
| Space group                                                  | <i>P</i> 2 <sub>1</sub> / <i>n</i>                                              |
| <i>a</i> /Å                                                  | 12.5721(7)                                                                      |
| <i>b</i> /Å                                                  | 21.1723(9)                                                                      |
| <i>c</i> /Å                                                  | 13.9407(7)                                                                      |
| $\alpha$ /°                                                  | 90                                                                              |
| $\beta$ /°                                                   | 97.231(4)                                                                       |
| $\gamma$ /°                                                  | 90                                                                              |
| Volume/Å <sup>3</sup>                                        | 3681.2(3)                                                                       |
| <i>Z</i>                                                     | 4                                                                               |
| $\rho_{\text{calc}}/\text{g}\cdot\text{cm}^{-3}$             | 1.652                                                                           |
| $\mu/\text{mm}^{-1}$                                         | 7.788                                                                           |
| <i>F</i> (000)                                               | 1852.0                                                                          |
| Crystal size/mm <sup>3</sup>                                 | 0.064 × 0.044 × 0.021                                                           |
| Radiation                                                    | CuK $\alpha$ ( $\lambda$ = 1.54178)                                             |
| 2 $\theta$ range for data collection/°                       | 7.636 to 136.48                                                                 |
| Index ranges                                                 | -15 ≤ <i>h</i> ≤ 14, -25 ≤ <i>k</i> ≤ 24, -16 ≤ <i>l</i> ≤ 16                   |
| Reflections collected                                        | 88199                                                                           |
| Independent reflections                                      | 6684 [ <i>R</i> <sub>int</sub> = 0.1964, <i>R</i> <sub>sigma</sub> = 0.0805]    |
| Data/restraints/parameters                                   | 6684/0/484                                                                      |
| Goodness-of-fit on <i>F</i> <sup>2</sup>                     | 1.025                                                                           |
| Final <i>R</i> indexes [ <i>I</i> ≥ 2 $\sigma$ ( <i>I</i> )] | <i>R</i> <sub>1</sub> = 0.0687, <i>wR</i> <sub>2</sub> = 0.1593                 |
| Final <i>R</i> indexes [all data]                            | <i>R</i> <sub>1</sub> = 0.1250, <i>wR</i> <sub>2</sub> = 0.1914                 |
| Largest diff. peak/hole / e $\cdot$ Å <sup>-3</sup>          | 0.99/-1.54                                                                      |

**Table S4.** Crystal and structure refinement data for **Ru'amp·0.5C<sub>6</sub>H<sub>12</sub>**.

|                                                              |                                                                                 |
|--------------------------------------------------------------|---------------------------------------------------------------------------------|
| Empirical formula                                            | C <sub>41</sub> H <sub>46</sub> ClN <sub>6</sub> O <sub>6</sub> Ru <sub>2</sub> |
| Formula weight                                               | 956.43                                                                          |
| Temperature/K                                                | 150.00(10)                                                                      |
| Crystal system                                               | triclinic                                                                       |
| Space group                                                  | <i>P</i> -1                                                                     |
| <i>a</i> /Å                                                  | 12.9823(4)                                                                      |
| <i>b</i> /Å                                                  | 13.7386(4)                                                                      |
| <i>c</i> /Å                                                  | 14.3812(4)                                                                      |
| $\alpha$ /°                                                  | 93.766(2)                                                                       |
| $\beta$ /°                                                   | 109.216(3)                                                                      |
| $\gamma$ /°                                                  | 112.885(3)                                                                      |
| Volume/Å <sup>3</sup>                                        | 2175.45(12)                                                                     |
| <i>Z</i>                                                     | 2                                                                               |
| $\rho_{\text{calc}}/\text{g}\cdot\text{cm}^{-3}$             | 1.460                                                                           |
| $\mu/\text{mm}^{-1}$                                         | 6.603                                                                           |
| <i>F</i> (000)                                               | 974.0                                                                           |
| Crystal size/mm <sup>3</sup>                                 | 0.146 × 0.079 × 0.069                                                           |
| Radiation                                                    | CuK $\alpha$ ( $\lambda$ = 1.54184)                                             |
| 2 $\theta$ range for data collection/°                       | 6.676 to 154.144                                                                |
| Index ranges                                                 | -16 ≤ <i>h</i> ≤ 16, -17 ≤ <i>k</i> ≤ 17, -16 ≤ <i>l</i> ≤ 18                   |
| Reflections collected                                        | 25322                                                                           |
| Independent reflections                                      | 8721 [ <i>R</i> <sub>int</sub> = 0.0151, <i>R</i> <sub>sigma</sub> = 0.0157]    |
| Data/restraints/parameters                                   | 8721/0/626                                                                      |
| Goodness-of-fit on <i>F</i> <sup>2</sup>                     | 1.094                                                                           |
| Final <i>R</i> indexes [ <i>I</i> ≥ 2 $\sigma$ ( <i>I</i> )] | <i>R</i> <sub>1</sub> = 0.0352, <i>wR</i> <sub>2</sub> = 0.1165                 |
| Final <i>R</i> indexes [all data]                            | <i>R</i> <sub>1</sub> = 0.0366, <i>wR</i> <sub>2</sub> = 0.1177                 |
| Largest diff. peak/hole / e·Å <sup>-3</sup>                  | 1.33/-0.70                                                                      |

#### S4. Magnetic measurements

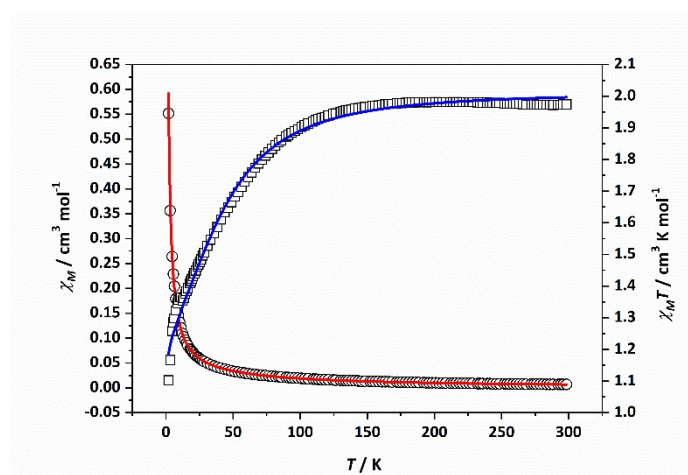

Figure S11. Temperature dependence of the molar susceptibility  $\chi_M$  (circles) and  $\chi_M T$  (squares) for **Ru'hmp**. Solid lines are the best fit to the data as described in the text.

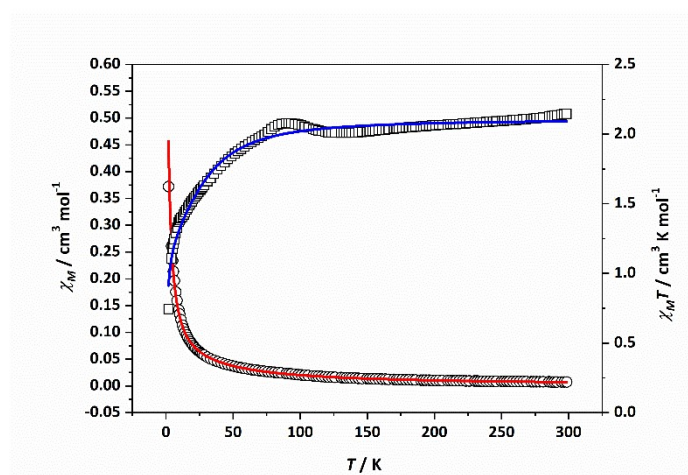

Figure S12. Temperature dependence of the molar susceptibility  $\chi_M$  (circles) and  $\chi_M T$  (squares) for **Ru'amp**. Solid lines are the best fit to the data as described in the text.

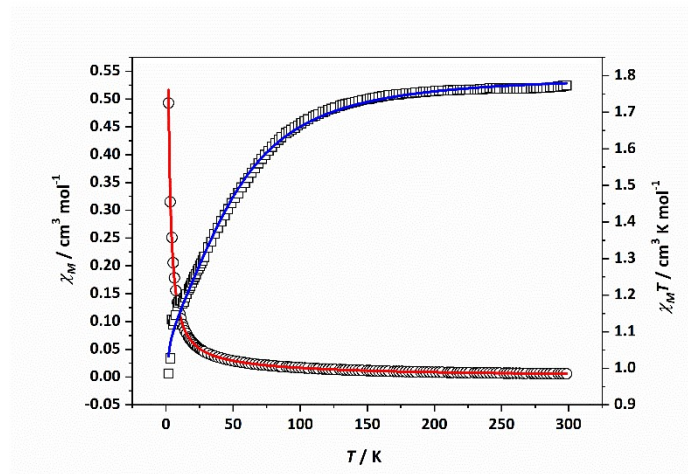

Figure S14. Temperature dependence of the molar susceptibility  $\chi_M$  (circles) and  $\chi_M T$  (squares) for **Ru'amp**. Solid lines are the best fit to the data as described in the text.

Equations S1-S4 employed in the fitting of the magnetic data:

$$\chi_M = \frac{\chi_{\parallel} + 2\chi_{\perp}}{3}$$

**Equation S1**

$$\chi_{\parallel} = \left( \frac{Ng^2\beta^2}{k_B T} \right) \left[ \frac{1 + 9\exp\left(-2D/k_B T\right)}{4\left(1 + \exp\left(-2D/k_B T\right)\right)} \right]$$

**Equation S2**

$$\chi_{\perp} = \left( \frac{Ng^2\beta^2}{k_B T} \right) \left[ \frac{4 + \left(\frac{3k_B T}{D}\right)\left(1 - \exp\left(-2D/k_B T\right)\right)}{4\left(1 + \exp\left(-2D/k_B T\right)\right)} \right]$$

**Equation S3**

$$\chi_M' = \frac{\chi_M}{1 - \left(\frac{2zJ}{Ng^2\beta^2}\right)\chi_M}$$

**Equation S4**

( $N$ ,  $g$ ,  $\beta$ , and  $k_B$  have their usual meanings)

### S5. Procedure employed to assign polyhedral symbol, coordination index, configuration number and chirality symbol to coordination compounds with paddlewheel structure

In order to fully describe the configuration of a coordination compound, three factors have to be provided:<sup>1</sup> the coordination geometry (overall shape of the molecule), the relative configuration (relative position of the components) and the absolute configuration (specific enantiomer when the mirror images are non-superimposable).

#### Coordination geometry

Binuclear paddlewheel compounds are characterized by the presence of two metal centers, usually bonded, and four bridging ligands between them. In addition, they can have two, one or no donor atoms at the axial positions. The chosen polyhedral symbol for these complexes is *PW* followed by the coordination number: 10, 9 or 8, respectively:

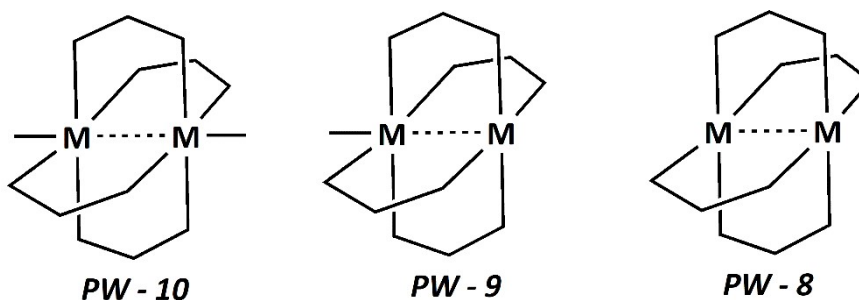

#### Configuration number

This number allows the distinction among the different possible isomers. To obtain it, a priority number based on Cahn–Ingold–Prelog rules<sup>2</sup> is assigned to the donor atoms of the ligands. Then, a number associated to each metal center is obtained starting by the axial position (if occupied) followed by the other four equatorial positions searching the lowest number possible. When the metal centers are not the same, the number selected for the configuration number is the one obtained from the metal center with highest atomic number (or atomic mass if they are isotopes). When both metal centers are equal, the metal with the lowest number is selected to define the configuration number. Different examples of the number assignment are depicted below.

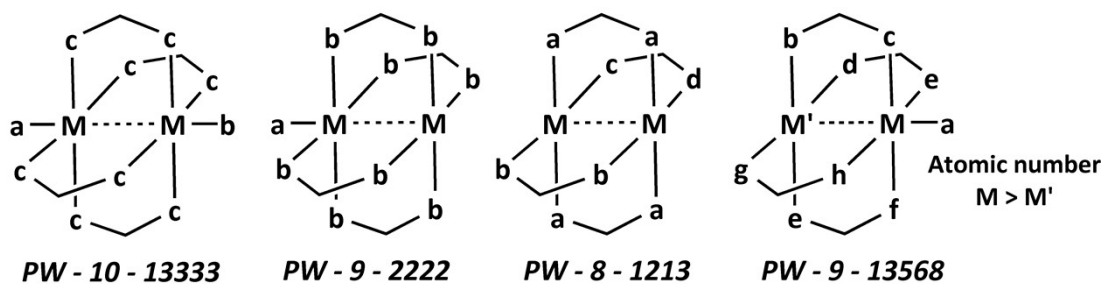

#### Absolute configuration: chirality symbol

The chirality symbol is obtained from the configuration number following the sequence from the highest to the lowest priority number considering the point of view from outside of the chosen metal center. If the sequence proceeds in a clockwise fashion, it is assigned the chirality symbol *C*; if the sequence proceeds anticlockwise, it is assigned *A* as

<sup>1</sup> Nomenclature of Inorganic Chemistry. IUPAC Recommendations 2005; N. G. Connelly, Royal Society of Chemistry (Great Britain), International Union of Pure and Applied Chemistry, Eds.; Royal Society of Chemistry Publishing/IUPAC: Cambridge, UK, (2005).

<sup>2</sup> (a) R. S. Cahn, C. Ingold, V. Prelog, Specification of Molecular Chirality. *Angew. Chem. Int. Ed. Engl.*, 1996, **5** (4), 385–415. (b) V. Prelog, G. Helmchen, G. Basic Principles of the CIP-System and Proposals for a Revision. *Angew. Chem. Int. Ed. Engl.*, 1982, **21** (8), 567–583.

chirality symbol. These symbols are selected because the chirality arises from the distribution of the donor atoms/ligands around the stereogenic metal-metal bond.

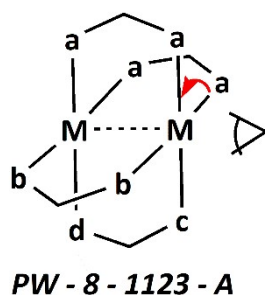

If the sequence can go both clockwise and anticlockwise, the complex is not chiral:

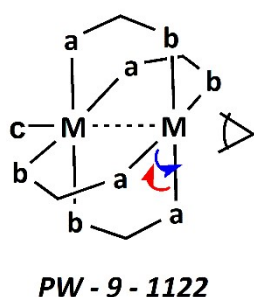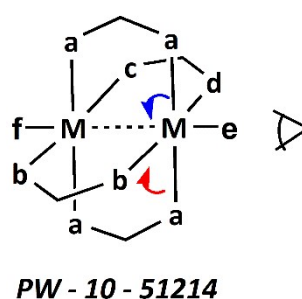

When the two sequence numbers are equal, the two sequences must be checked to get the chirality symbol. If both provide the same symbol, the complex is chiral;

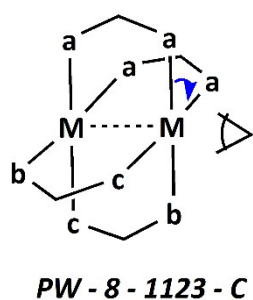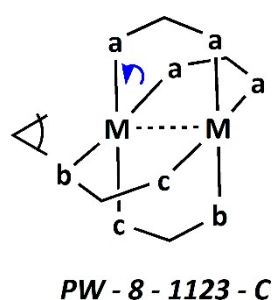

if they provide different chirality symbols, the compound is not chiral:

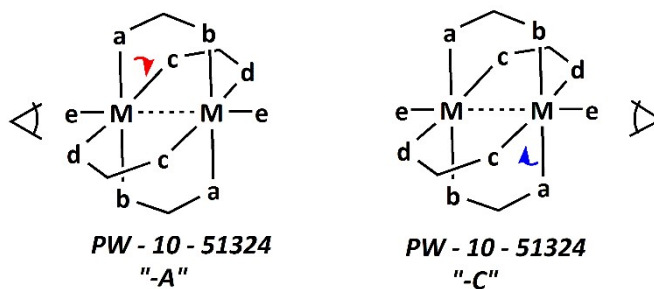

**There is an inversion center.**

In this case, and if both metals are equal, there is an inversion center placed between the two metal atoms. If the metals are different, the chirality index is assigned using the metal with the lowest configuration number. If both are equal, the heaviest metal is chosen.

Following the procedure herein described, the polyhedral symbol, coordination index, configuration number and chirality symbol of the molecules found in the asymmetric unit of the centrosymmetric crystal structures of **Ruhmp**, **Ruamp**, **Ru'hmp**, and **Ru'amp** are *PW-9-2455-A*, *PW-9-2344-A*, *PW-9-2455-C*, and *PW-9-2344-C*, respectively (see below).

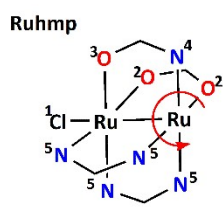

*PW-9-2455-A*

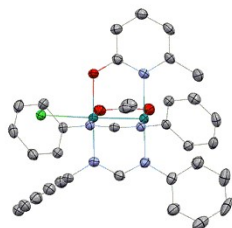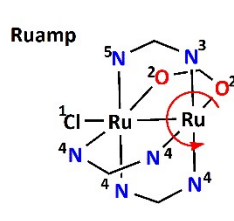

*PW-9-2344-A*

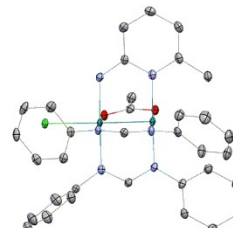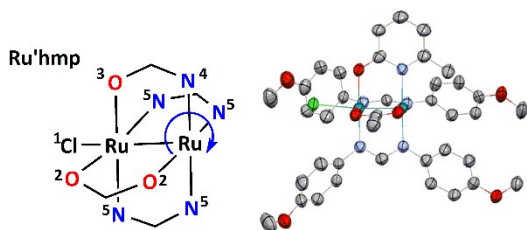

*PW-9-2455-C*

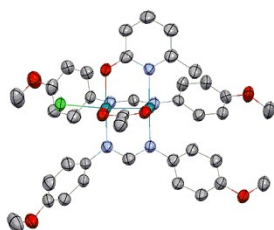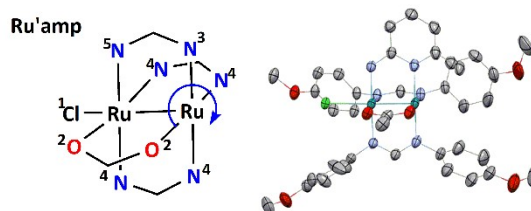

*PW-9-2344-C*

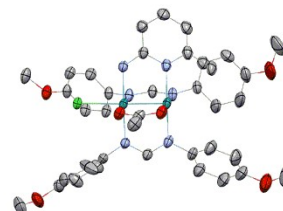

Supplement: d4ce01040j1.pdf [file d4ce01040j1.pdf]
